# Supplementary material for: Molecular-level design and green process engineering: optimizing pseudo-graphitic domains in pitch-derived hard carbon for fast sodium storage
Source: Royal Society of Chemistry journal article supplement (doi:10.1039/d5gc00902b), 2025-01-01
Supplement: d5gc00902b1.pdf [file d5gc00902b1.pdf]

## Supporting Information

# **Molecular-level Design and Green Process Engineering: Optimizing Pseudo-Graphitic Domains in Pitch-derived hard carbon for Fast Sodium Storage**

*Dan Zhao, Hanqing Zhao\*, Lingwei Kong, Shulian Lei, Boyan Cui, Tingjun Fu, and Zhong Li \**

*State Key Laboratory of Clean and Efficient Coal Utilization, College of Chemistry and Chemical  
Engineering, Taiyuan University of Technology, Taiyuan 030024, Shanxi, China*

*\* Corresponding author.*

*E-mail address: zhaohanqing@tyut.edu.cn (H. Zhao) lizhong@tyut.edu.cn (Z. Li)*

## 1. Materials and general methods

### 1.1 Synthesis of carbon materials

Coal tar pitch (CTP, softening point of 78.8 °C) was obtained from Ningxia Baichuan New materials Co., Ltd. The CTP was oxidized with the mixed solution of formic acid and hydrogen peroxide, specifically prepared as follows: A homogeneous mixture of 240 mL formic acid and 24 mL hydrogen peroxide was prepared, followed by the addition of 1.6 g of CTP. The oxidative cleavage reaction was carried out under continuous stirring at 25 °C for 20 h. The resulting mixture was transferred to a 50 mL centrifuge tube and separated by centrifugation at 10,000 rpm for 10 min. The supernatant was collected and concentrated using a rotary evaporator at 60 °C under reduced pressure (-0.08 MPa). The obtained product underwent purification through two cycles of dissolution-precipitation with absolute ethanol, yielding a yellowish-brown lightweight oxidation product (denoted as L-OCTP). Since the L-OCTP did not contain graphite nanodomains, it was also designated as NGC (N: none; G: graphite nanodomains; C: CTP). The precipitate at the bottom of the centrifuge tube was vacuum-filtered through a 0.22 μm microporous membrane and repeatedly washed until the filtrate was neutral. After vacuum drying at 60 °C for 12 h, a dark brown solid oxidation product (designated as S-OCTP) was obtained.

1.5 g of NGC was dissolved in 150 mL of deionized water, placed in Teflon. After sonicated for 30 min, an aqueous NGC solution with a concentration of 10 % was configured. Then, it was hydrothermal treatment in an oven at 180 °C for 6 h. After cooling, the samples were washed with deionized water until the filtrate was colorless. Finally, the samples were obtained by drying overnight in vacuum oven at 60 °C, denoted as SGC (S: small). As the same process, LGC (L: large) was prepared, in which the concentration of NGC solution was 50%. Accordingly, the derived HC was obtained by carbonizing CTP, NGC, SGC, LGC, and S-OCTP in a tubular furnace at 1300 °C for 2 h with a heating rate of 5 °C min<sup>-1</sup> in Ar atmosphere. The hard carbons were labeled as SC, NGC-HC, SGC-HC, LGC-HC, and S-OCTP-HC, respectively.

### 1.2 Materials Characterization

The morphologies and microstructures of the samples were investigated by Scanning Electron Microscopy (SEM, FEI-Quanta FEG 250) and Transmission Electron Microscopy (TEM, JEOL JEM-2100FMII). The carbonization of sample was detected via Thermogravimetric analysis (TGA). The elemental distribution of sample was tested with an energy dispersive spectrometer (EDS). To analyze the surface chemistry of the samples, X-ray Photoelectron Spectroscopy (XPS, Thermo Fisher Scientific Escalab 250Xi) and Fourier Transform Infrared Spectra (FTIR, Bruker Invenio s) were used. The structure property of CTP precursor was detected by Wide cavity solid state nuclear magnetic spectrometer (<sup>13</sup>C NMR, AVANCE IIITM 600 MHz). The closed pore structure of sample was determined by synchrotron radiation SAXS-WAXS techniques (Beijing Synchrotron Radiation Facility:1W2A). N<sub>2</sub> adsorption-desorption was carried out at Beishide 3H-200PS2 instrument at -196 °C. The X-ray diffraction (XRD) characterization was carried out to analysis the crystal structure of CTP precursor and derived HC, and structure change of in-situ discharge/charge process on Rigaku SmartLab SE diffractometer using Cu Kα radiation source (λ = 0.154056 nm, θ = 10-80°). Raman and ex/in-situ Raman spectra were recorded by a Renishaw Invia Reflex (laser: 514 nm).

### 1.3 Electrochemical Measurements

In a glove box, the half-cells were assembled using 2025-type coin cell, where sodium piece as counter electrode, a glass fiber membrane as separator. The anode slurry was obtained by mixing the active materials, Super P, and poly(vinylidene fluoride) (PVDF) at the mass ratio of 7:2:1 in N-methyl-2-pyrrolidone (NMP). Then, the slurry was uniformly spread on copper foil by an applicator (100 μm). Vacuum dried at 100 °C overnight, the electrode sheets were received with a loading mass of active materials about 1.0 mg cm<sup>-2</sup>. NaPF<sub>6</sub> (1M) dissolved into 100% DME as the electrolyte. Na<sub>3</sub>V<sub>2</sub>(PO<sub>4</sub>)<sub>3</sub>@C (NVP@C), Super P, and PVDF were mixed in NMP with a mass ratio of 8:1:1, and coated evenly on an aluminum foil. Then, it was assembled with SGC-HC anode sheet into a full-cell. The separator was the same as the half cells. The electrolyte was 1 M NaClO<sub>4</sub> in ethylene carbonate (EC) and propylene carbonate (PC) (1:1, vol/vol) with 5 wt% fluoroethylene carbonate (FEC).

The galvanostatic charge/discharge, rate capability, long-term cycle stability, and galvanostatic intermittent titration technique (GITT) were characterized on LAND 2001A apparatus in a voltage range of 0.01-3.0 V. Cyclic voltammetry (CV) profiles and electrochemical impedance spectra (EIS) were performed at the CHI1000C and CHI660E workstation, respectively.

## 2. Supplementary Fig.S and Table S

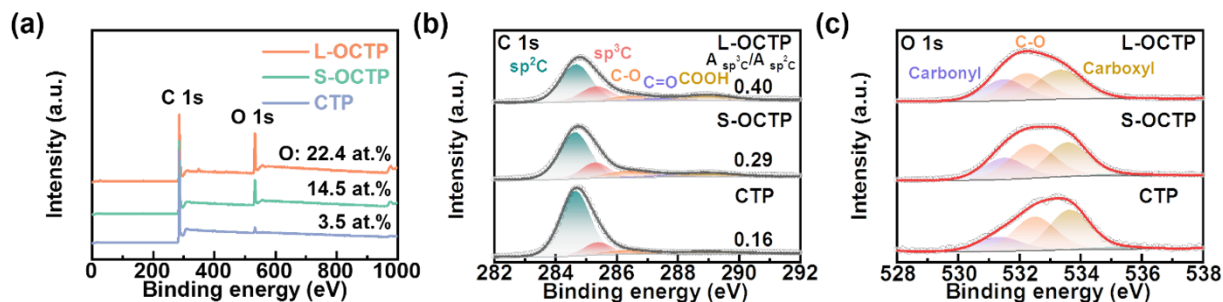

**Fig. S1** (a) The full XPS spectra and high-resolution XPS spectra of (b) C 1s and (c) O 1s of OOTP samples.

The C 1s XPS spectra of the sample (Fig. S1b) are divided into  $sp^2$  C,  $sp^3$  C, C-O, C=O, and COOH peaks at binding energies of 284.6, 285.3, 286.4, 287.4, and 288.9 eV, respectively. In the O 1s XPS spectrum of the sample (Fig. S1c), peaks corresponding to carbonyl, C-O, and carboxyl are observed at 531.5, 532.5, and 533.7 eV, respectively.

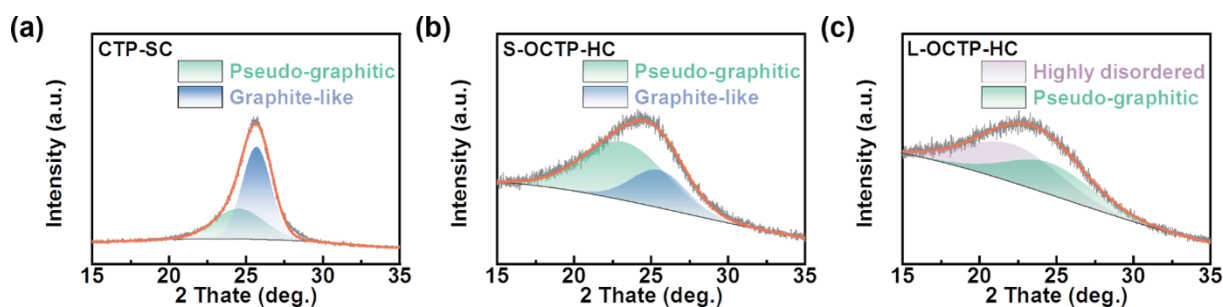

**Fig. S2** The XRD patterns and the fitted results of C (002) diffraction peak for (a) CTP-SC, (b) S-OOTP-HC, and (c) L-OOTP-HC.

As shown in Fig. S2a-c, the (002) peak can be fitted into three crystalline types based on the interlayer spacing: highly disordered carbon ( $> 0.4$  nm), pseudo-graphitic nanodomain ( $0.36 \sim 0.4$  nm), and graphite-like nanodomain ( $< 0.36$  nm). The position and proportion of these three crystalline types were listed in Table S1.

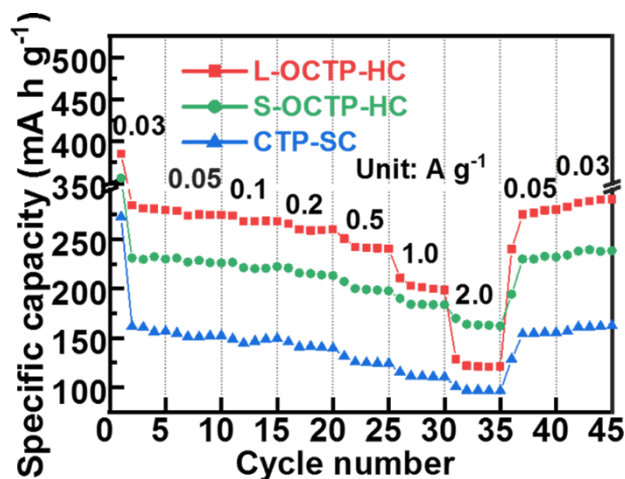

**Fig. S3** Rate performance from  $0.03 \text{ A g}^{-1}$  to  $2 \text{ A g}^{-1}$ .

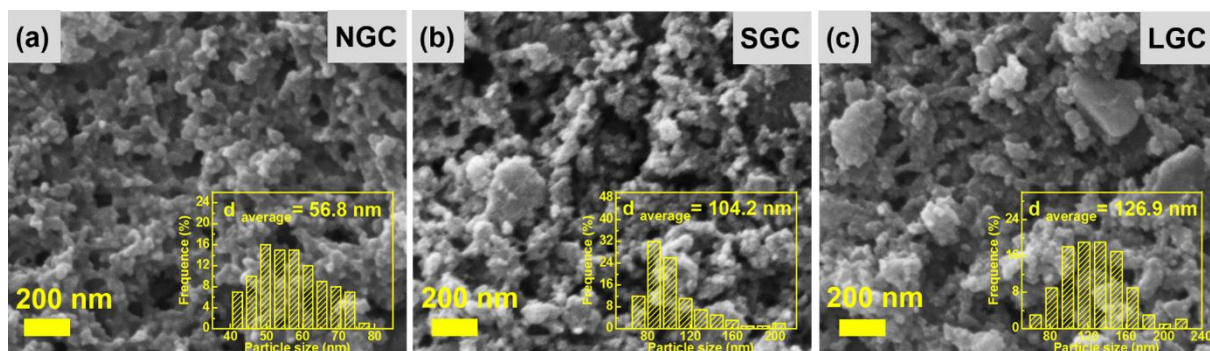

Fig. S4 (a-c) SEM images of NGC, SGC, and LGC.

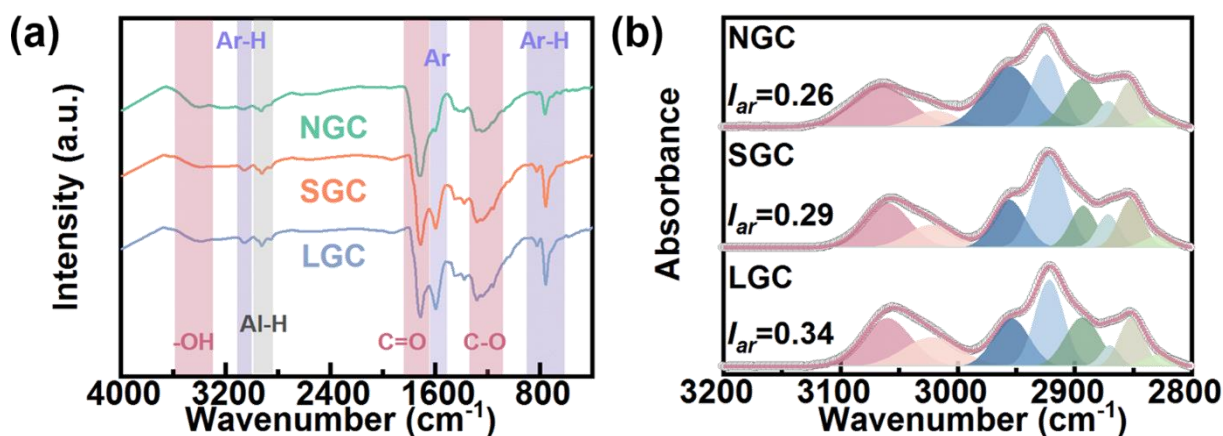

Fig. S5 The FTIR curves and (b) the fitted curves of FTIR in the range of 3200-2800  $\text{cm}^{-1}$  of NGC, SGC, and LGC.

In Fig. S5a, the FTIR spectra of all samples show the -OH stretching vibration band at approximately 3418  $\text{cm}^{-1}$ , the C=O stretching vibration band at 1710  $\text{cm}^{-1}$ , and the C-O stretching bands at 800-1200  $\text{cm}^{-1}$ . Other peaks appear in the purple region at 3100-2980  $\text{cm}^{-1}$ , 1600, and 700-900  $\text{cm}^{-1}$ , belonging to the  $\text{sp}^2$  aromatic C-H stretching bond (Ar-H). The peaks in the grey region of 2980-2830  $\text{cm}^{-1}$  are attributed to the  $\text{sp}^3$  aliphatic C-H (Al-H) stretching bond. The aromaticity index ( $I_{ar}$ ), reflecting the content of aromatic components in the material, can be calculated by fitting the peaks at 3100-2800  $\text{cm}^{-1}$  (in Fig. S5b). Among them, the peaks at around 3060 and 3020  $\text{cm}^{-1}$  belong to aromatic C-H stretching bands, and the remaining five peaks at 2954, 2921, 2893, 2870, 2852, and 2830  $\text{cm}^{-1}$  are ascribed to the vibration of aliphatic hydrogen.

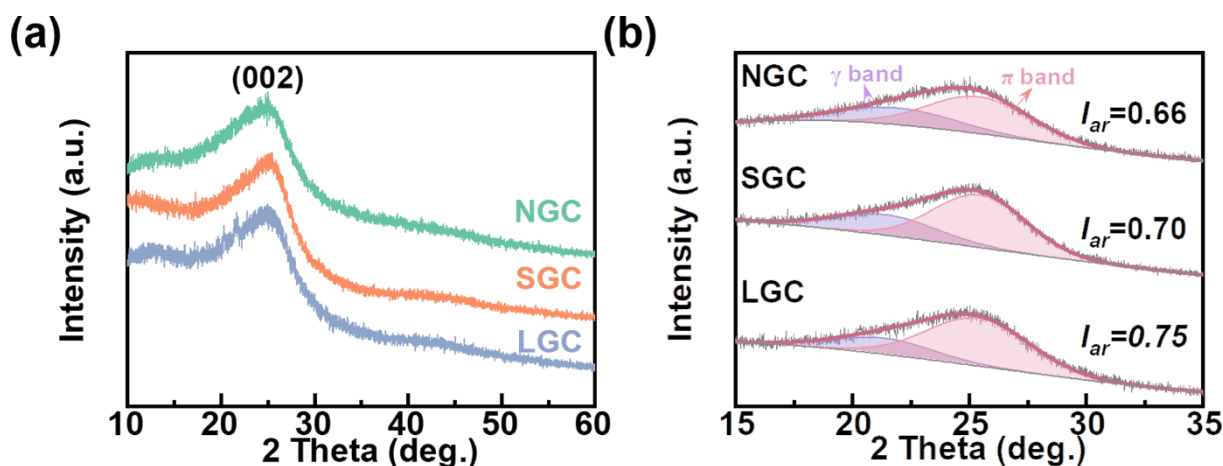

Fig. S6 (a) The XRD patterns and (b) the fitted curves about C (002) peak.

The XRD patterns (Fig. 1e and S6) of samples exhibit an obvious diffraction peak located at around 26°, corresponding to the (002) lattice plane of carbon.

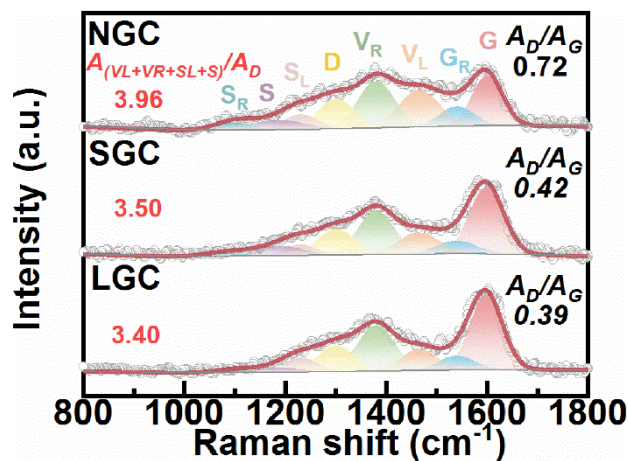

**Fig. S7** The Raman spectra of NGC-HC, SGC-HC, and LGC-HC.

Raman spectra of all samples display two main peaks centered at 1350 and 1585  $\text{cm}^{-1}$ , which are related to the disorder-induced D-bands and in-plane vibrational G-bands, respectively (Fig. S7). Commonly, the area ratio of D and G peaks ( $A_D/A_G$ ) can reflect the disorder degree of carbon.

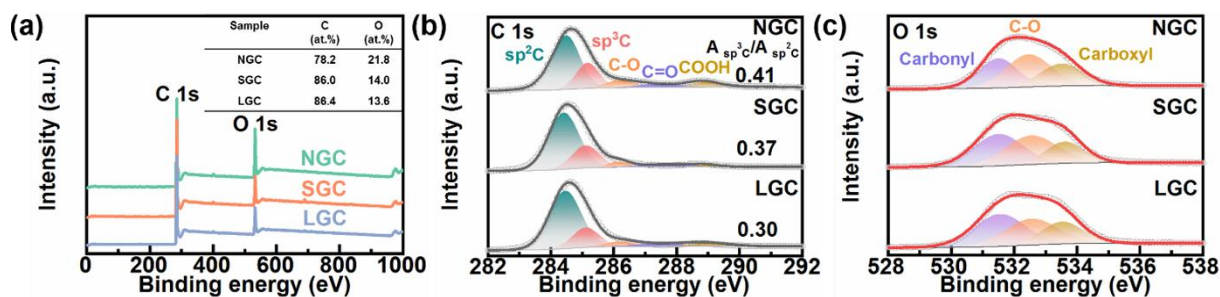

**Fig. S8** (a) The full XPS spectra and high-resolution XPS spectra of (b) C1s and (c) O 1s of all samples.

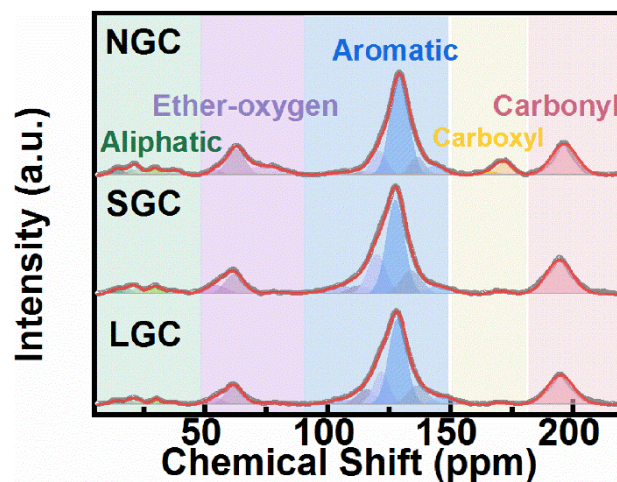

**Fig. S9** The fitted curves of  $^{13}\text{C}$  NMR spectra.

Generally, all samples can be roughly divided into four carbon atom types, namely aliphatic carbon at 0~50 ppm, ethoxy carbon at 50~90 ppm, aromatic carbon at 90~165 ppm, and the carbon atoms of carbonyl and carboxyl groups at 165~220 ppm.



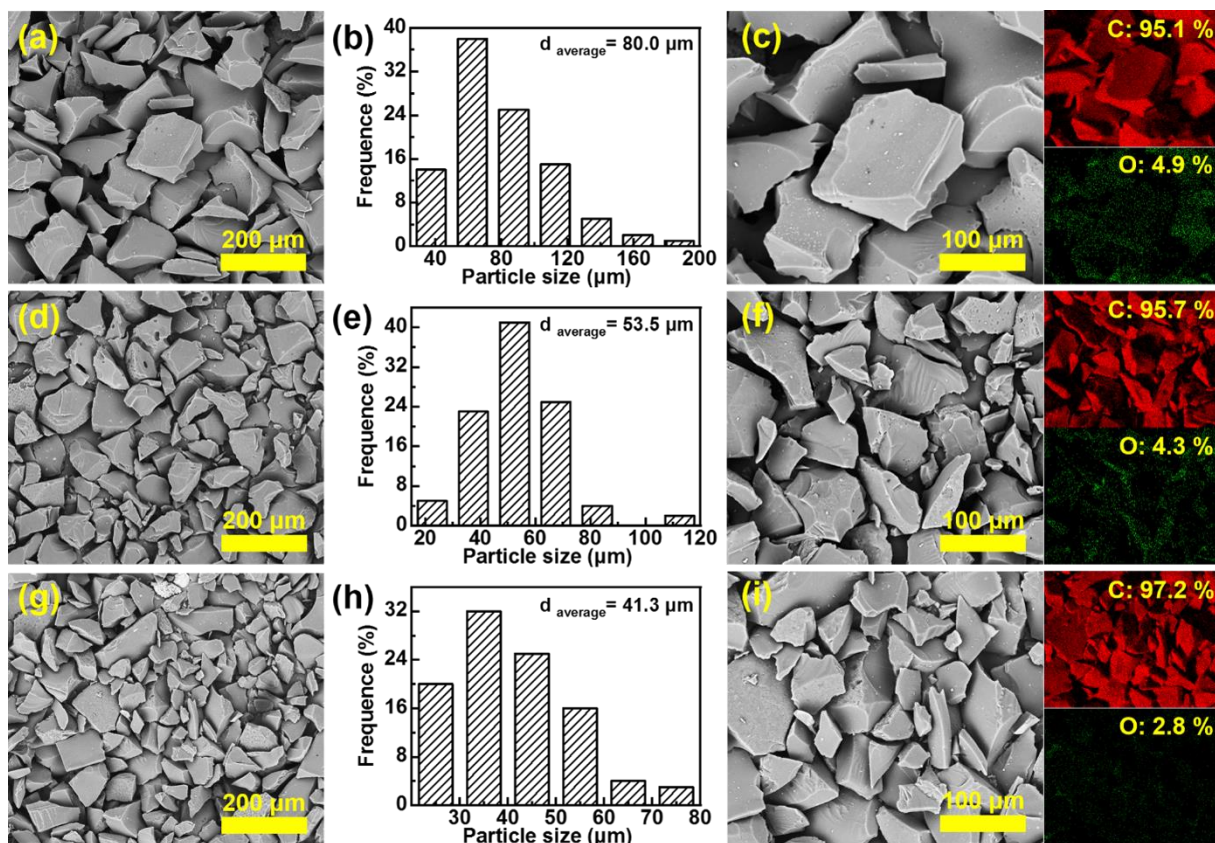

**Fig. S10** SEM-EDS images and the distribution of particle size for (a-c) NGC-HC, (d-f) SGC-HC, and (g-i) LGC-HC.

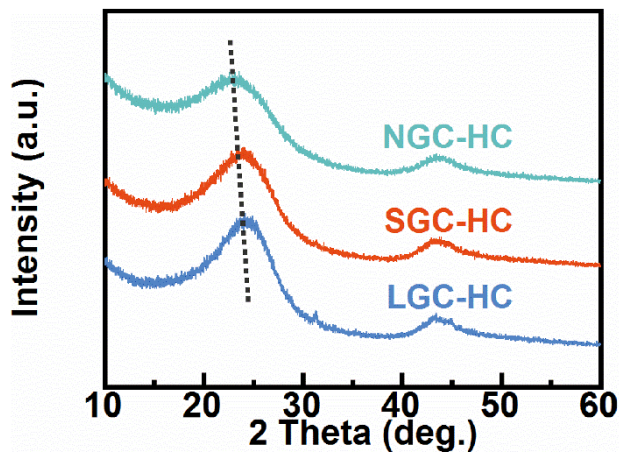

**Fig. S11** The XRD patterns of NGC-HC, SGC-HC, and LGC-HC.

The XRD patterns (Fig. 1e) of samples exhibit an obvious diffraction peak located at around  $26^\circ$ , corresponding to the (002) lattice plane of carbon, and C (100) peak at around  $42.5^\circ$ . The parameter (R), a representative measure calculated from the intensity of the (002) peak, which represents the ratio of the peak height to the background, has been used to quantify the degree of carbon disorder.

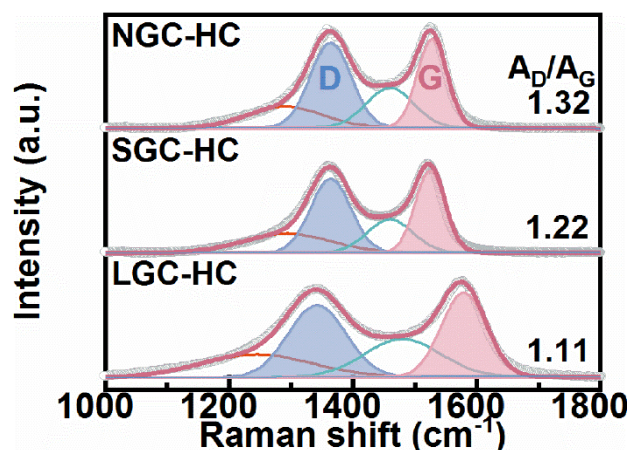

**Fig. S12** The Raman spectra of NGC-HC, SGC-HC, and LGC-HC.

Raman spectra of all samples display two main peaks centered at 1350 and 1585  $\text{cm}^{-1}$ , which are related to the disorder-induced D-bands and in-plane vibrational G-bands, respectively. Commonly, the area ratio of D and G peaks ( $A_D/A_G$ ) can reflect the disorder degree of carbon.

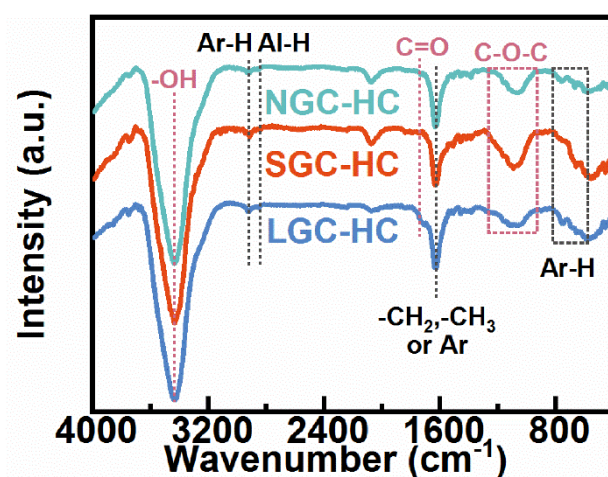

**Fig. S13** The FTIR spectra of NGC-HC, SGC-HC, and LGC-HC.

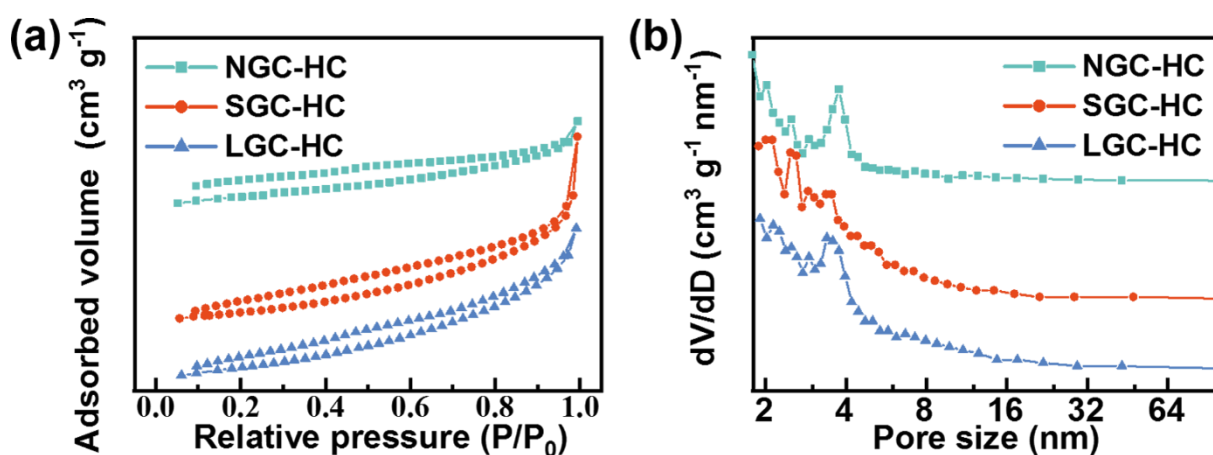

**Fig. S14** (a) The  $\text{N}_2$  adsorption-desorption isotherms and (b) the pore size distribution of the sample.

The specific surface area was calculated using the Brunauer-Emmett-Teller (BET) method. The mesoporous and micropore pore size distribution of the samples was obtained by the Barrett-Joyner-Halenda (BJH) model and T-Plot model.

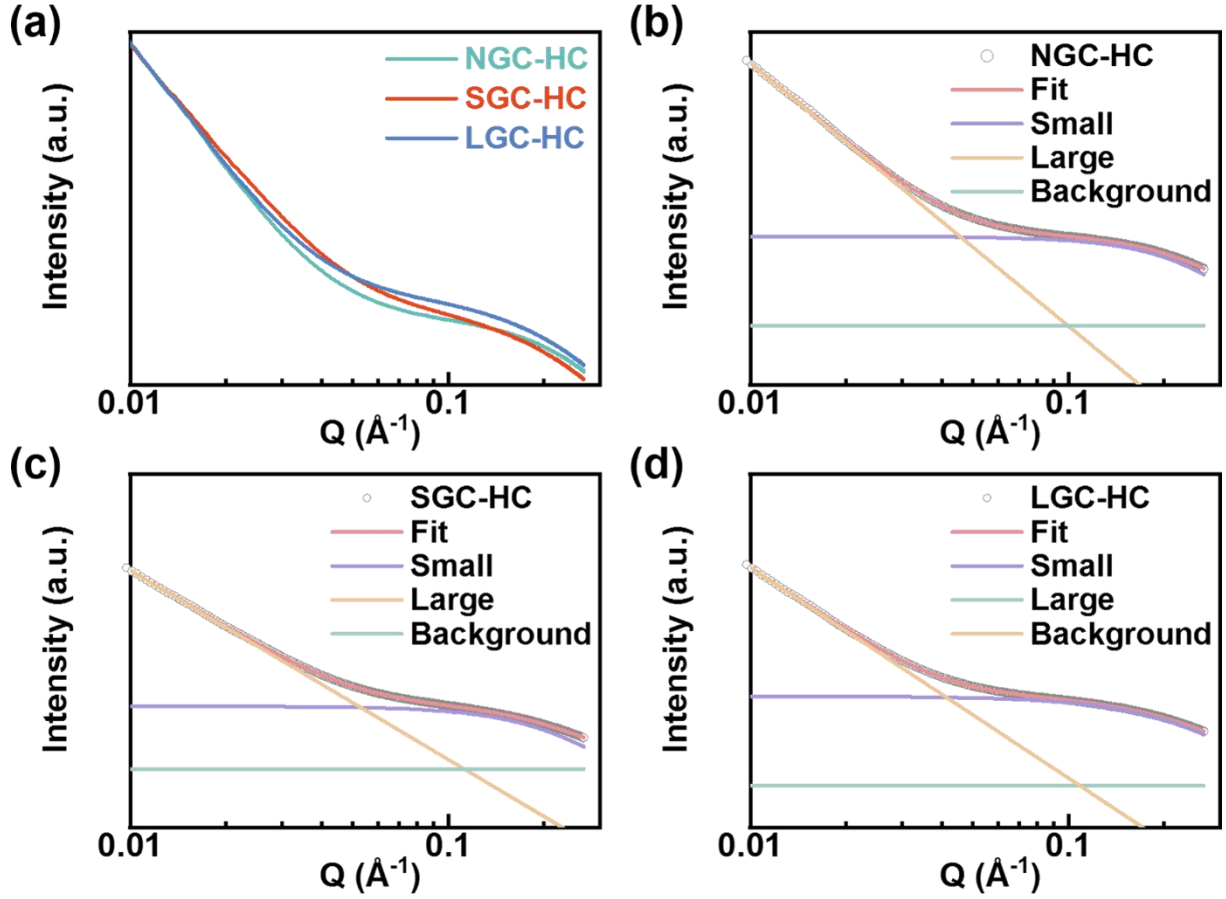

**Fig. S15** (a) SAXS patterns and (b-d) fitting curve of SAXS patterns presenting pores of the sample.

The closed pore structure of sample was determined by synchrotron radiation SAXS-WAXS techniques (Beijing Synchrotron Radiation Facility:1W2A). The X-ray with 0.154 nm was injected into 1W2A beamline and the beam spot with  $1.4 \times 0.2$  mm was set on Pilatus 2MF detector. The samples were placed at 1834 mm far from SAXS detector. The two-dimension images were recorded with an exposure time of 2 s.

The SLD Calculator of Sasfit software was used to calculate the scattering length density (SLD) of the carbon materials. According to the following formula, the structure density ( $\rho_{\text{struct}}$ ) of the carbon materials was calculated by using the structural parameters:

$$\rho_{\text{struct}} = \rho_{\text{graphite}} \frac{d_{002}^{\text{graphite}}}{d_{002}} \left( \frac{d_{100}^{\text{graphite}}}{d_{100}} \right)^2 \quad (\text{Equ. 1})$$

Where  $\rho_{\text{graphite}}$  is the structural density of graphite.  $2.26 \text{ g cm}^{-3}$ ,  $d_{002}$  and  $d_{002}^{\text{graphite}}$  is the interlayer distance of the sample and of graphite respectively.  $d_{100}$  and  $d_{100}^{\text{graphite}}$  is the in-plane distance of the sample and of graphite respectively, as shown in Equ. 1.

The micropores of HC can be modeled by the semi-empirical Teubner-Strey model.

$$I_{mp} = I_0 \frac{1}{1 + C_1 Q^2 + C_2 Q^4} \quad (\text{Equ. 2})$$

$I_0$ ,  $C_1$  and  $C_2$  can be calculated by following equation:

$$I_0 = \frac{8\pi}{\rho_{\text{struct}}} \phi (\Delta SLD)^2 \frac{\xi^3}{(1 + (\frac{2\pi\xi}{d})^2)^2} \quad (\text{Equ. 3})$$

The  $d$  is the pore-pore distance and  $\xi$  is a correlation length that limits the extension of the order (Equ. 4 and 5) which were calculated from SasView software by fitting SAXS data.  $C_1$  was calculated from the  $d$  and  $\xi$ , then the closed pore diameter of the sample was calculated by Equ. 6.

$$d = 2\pi \left[ \frac{1}{2} C_2^{-\frac{1}{2}} - \frac{C_1}{4C_2} \right]^{-\frac{1}{2}} \quad (\text{Equ. 4})$$

$$\xi = \left[ \frac{1}{2} C_2^{-\frac{1}{2}} + \frac{C_1}{4C_2} \right]^{-\frac{1}{2}} \quad (\text{Equ. 5})$$

$$r = \sqrt{5C_1} \quad (\text{Equ. 6})$$



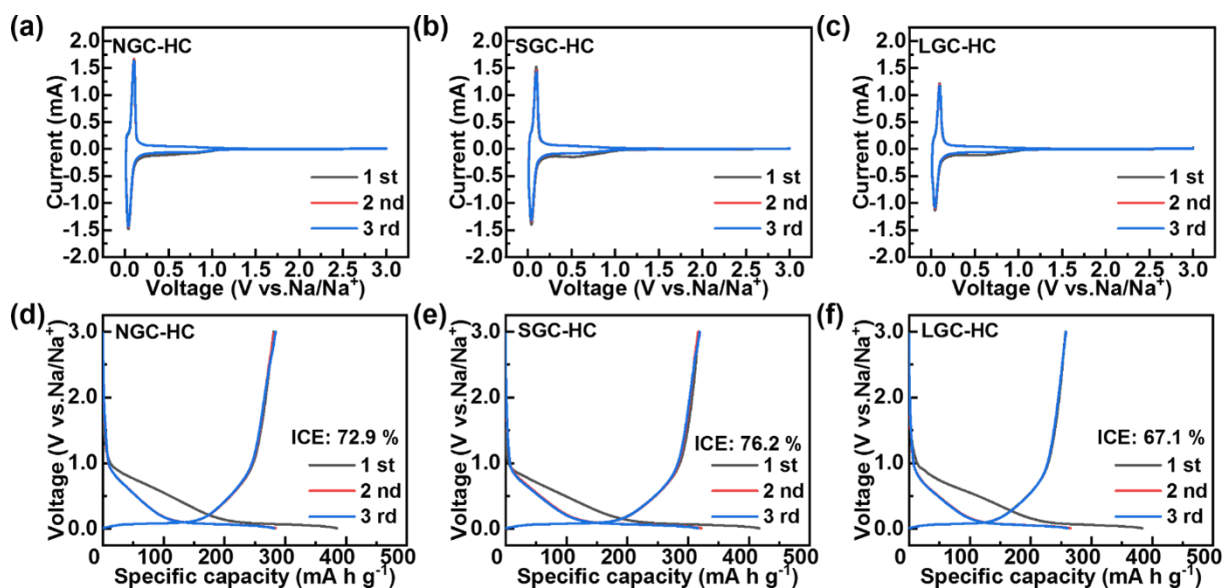

Fig. S16 (a-c) The CV curves in the initial three cycles and (d-f) galvanostatic charge/discharge curves at a current density of 0.03 A g<sup>-1</sup>.

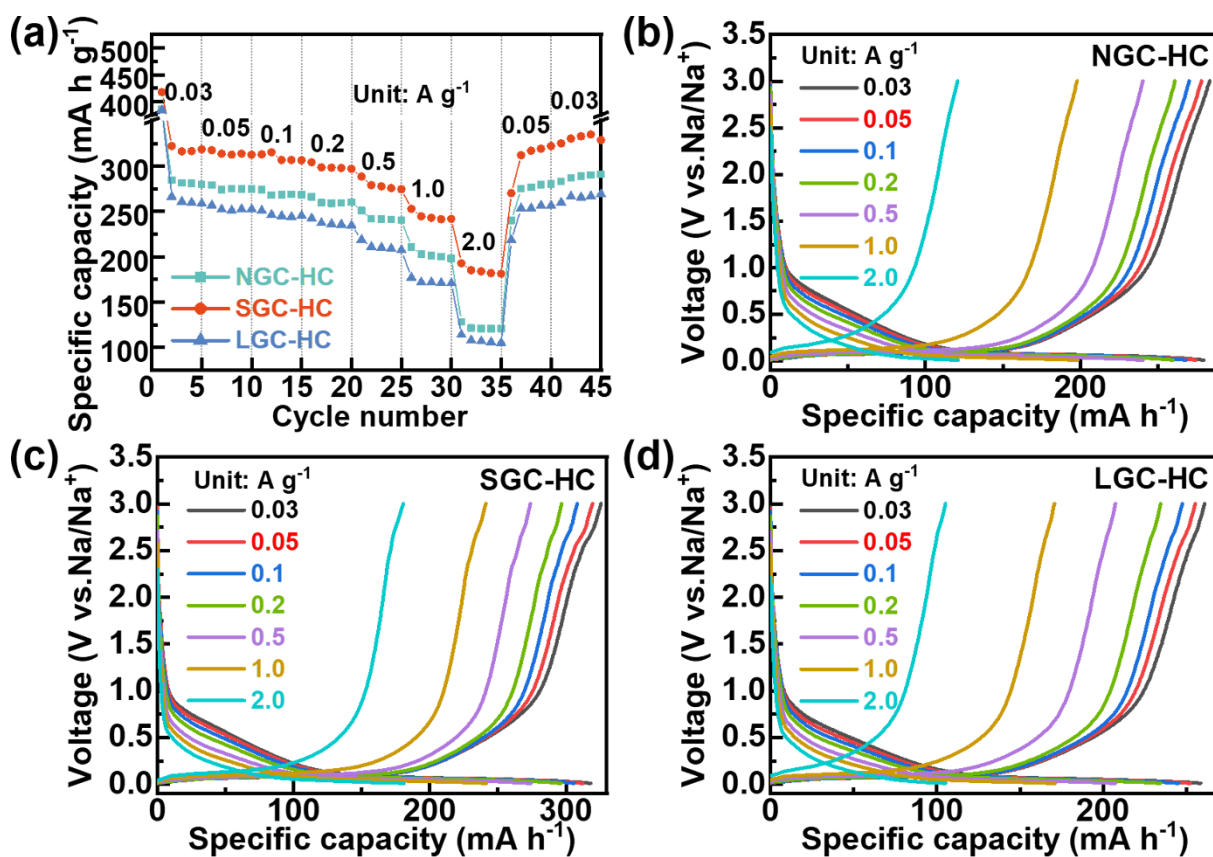

Fig. S17 (a) The rate performance, (b) galvanostatic charge/discharge curves at different rates of the sample.

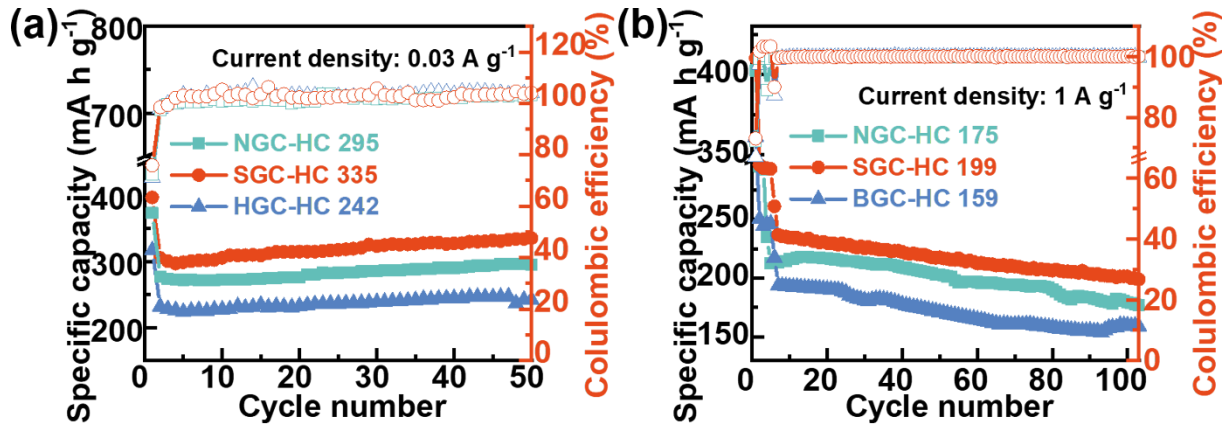

Fig. S18 The cycling stability at (c) 0.03 and (d) 1 A g<sup>-1</sup>.

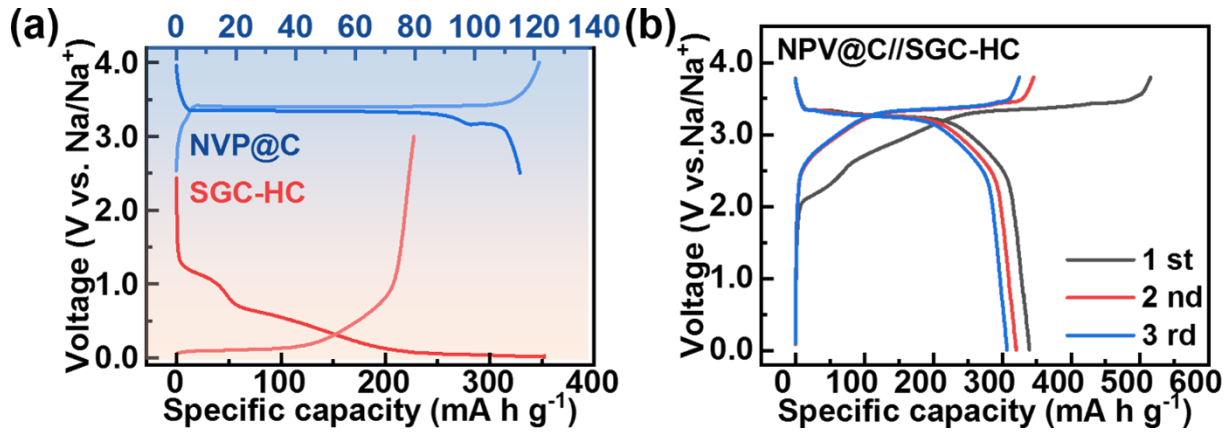

Fig. S19 Galvanostatic charge/discharge curves of (a) SGC-HC and NVP@C half-cell in the first cycle at 0.03 A g<sup>-1</sup>, (b) NVP@C//SGC-HC in the initial three cycles at a current density of 0.03 A g<sup>-1</sup>.

The capacity ratio of the negative to positive electrodes (N/P) is controlled at 1.2 to maximize the energy density and reinforce the stability of the Na-ion full cells. And the capacities are normalized by the active mass of the anode.

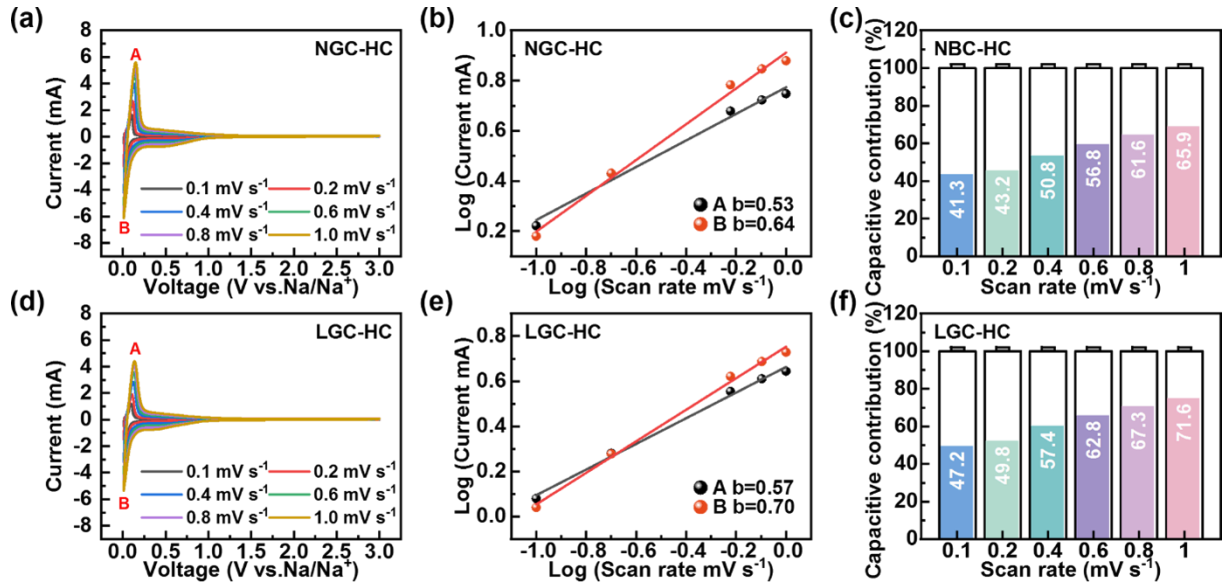

Fig. S20 (a,d) CV curves, (b,e) the linear correlation between  $\log(i)$  and  $\log(v)$ , and (c,f) capacitive contribution of NGC-HC and LGC-HC, respectively.

The peak current ( $i$ ) and scan rate ( $v$ ) obey the power-law relationship as follows:

$$i = av^b$$

$$\log(i) = b \log(v) + a$$

(Eqn. 7)

where  $a$  and  $b$  are constants. The  $b$  value can be calculated by fitting the  $\log(i)$ - $\log(v)$ , and the results are shown in Fig. 6b and S20b,e. When  $b$  value approaches 0.5, the Na storage is dominated by a diffusion-controlled process, while 1.0 means the electrochemical process is mainly controlled by a pseudo-capacitive process.

The pseudo-capacitive contribution ( $k_1v$ ) and diffusion-controlled contribution ( $k_2v^{1/2}$ ) were quantitatively calculated by the formula as

$$i = k_1v + k_2v^{1/2} \quad (\text{Eqn. 8})$$

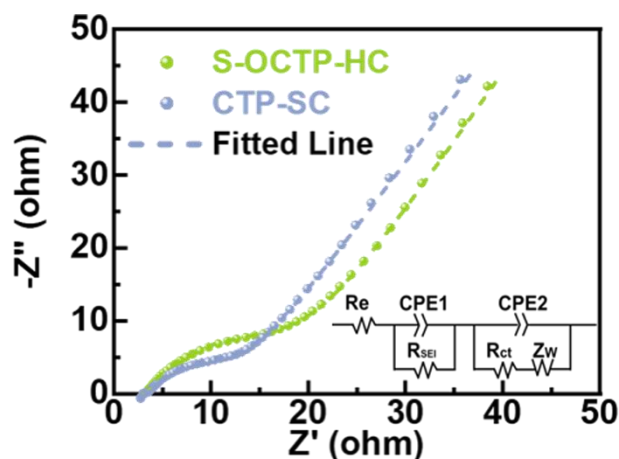

**Fig. S21** The Nyquist plots and the fitted results via the equivalent circuit diagram.

An equivalent circuit model was proposed to fit the EIS results, and the results are exhibited in Fig. 6d and Table S9. The curves are well-fitted with small chi-square values (less than  $10^{-3}$ ). In the equivalent circuit model (Fig. S21),  $R_e$  includes the self-resistance of electrolyte and electrode, the interface contact resistance of the current collector and electrode material,  $R_{SEI}$  stands for the resistance of  $\text{Na}^+$  through SEI film,  $R_{ct}$  represents the charge transfer resistance that related to the electrochemical reaction, CPE is considered as an imperfect capacitor,  $Z_w$  is diffused Warburg impedance owing to the  $\text{Na}^+$  diffusion inside of material.

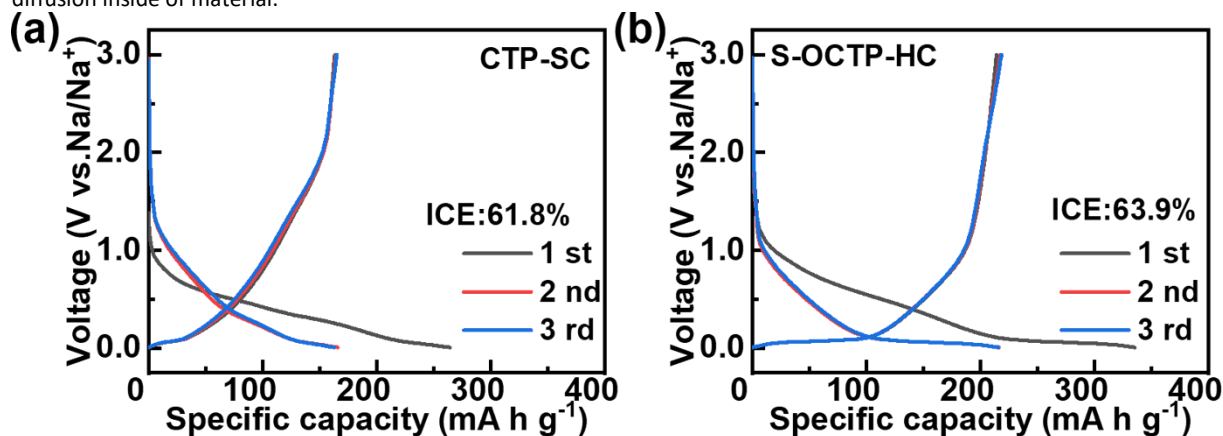

**Fig. S22** The galvanostatic charge/discharge curves at a current density of  $0.03 \text{ A g}^{-1}$ .

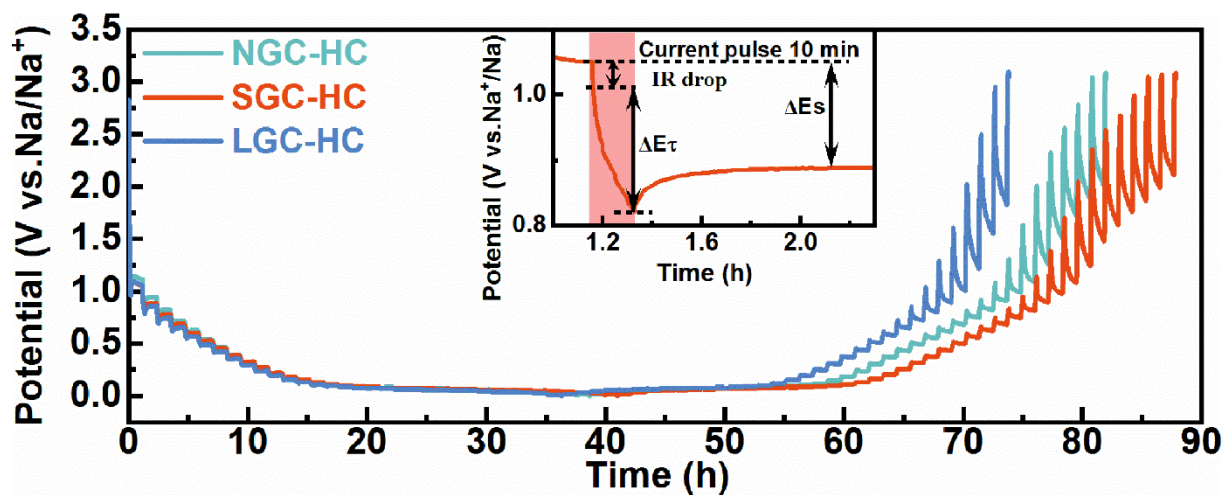

**Fig. S23.** GITT curves (inset: calculation method of  $\Delta E_s$  and  $\Delta E_\tau$  about the single GITT titration curve).

The LAND 2001A apparatus also was applied to analyse the diffusion coefficient of  $\text{Na}^+$  using the galvanostatic intermittent titration technique (GITT) (current pulse:  $0.1 \text{ A g}^{-1}$ , duration time: 10 min, relaxation time: 1 h). Fig. S23 displays the GITT curves of all samples in the second cycle with a pulse current of  $0.03 \text{ A g}^{-1}$ . The diffusion coefficients of  $\text{Na}^+$  ( $D_{\text{Na}^+}$ ) are calculated by Fick's second law and equation as follows:

$$D_{\text{Na}^+} = \frac{4}{\pi\tau} \left( \frac{m_B V_M}{M_b S} \right)^2 \left( \frac{\Delta E_s}{\Delta E_\tau} \right)^2 \quad (\text{Eqn. 9})$$

Here  $\tau$  is the current pulse time (s),  $M_b$ ,  $V_M$ , and  $m_B$  are the molecular weights (g/mol), molar volume ( $\text{cm}^3/\text{mol}$ ), and mass of the active material (g), respectively,  $S$  is the explored area ( $\text{cm}^2$ ),  $L$  is the thickness (cm) of the electrode,  $\Delta E_s$  and  $\Delta E_\tau$  (inset of Fig. S21) are the change in steady-state voltage and cell voltage, respectively.



**Table S1** Textural parameters and fitted results of the samples by XRD.

| Sample    | $d_{002}$<br>(nm) | $L_a$<br>(nm) | $L_c$<br>(nm) | Highly disordered |          | Pseudo-graphitic |          | Graphite-like     |          |
|-----------|-------------------|---------------|---------------|-------------------|----------|------------------|----------|-------------------|----------|
|           |                   |               |               | 2 $\theta$<br>(°) | Area (%) | 2 $\theta$ (°)   | Area (%) | 2 $\theta$<br>(°) | Area (%) |
| CTP-SC    | 0.354             | 8.78          | 3.09          | -                 | -        | 24.6             | 36       | 25.7              | 64       |
| S-OCTP-HC | 0.379             | 6.66          | 1.54          | -                 | -        | 23.2             | 70       | 25.5              | 30       |
| L-OCTP-HC | 0.385             | 6.19          | 1.28          | 22.2              | 57       | 24.6             | 43       |                   |          |

**Table S2** Peak assigned for 8 sub-peaks of Raman spectra.

| Band name | Position | Description                                                                                                                                 |
|-----------|----------|---------------------------------------------------------------------------------------------------------------------------------------------|
| $G$       | 1598     | graphite $E_{2g}^{2g}$ , aromatic ring quadrant breathing, alkene C=C                                                                       |
| $G_R$     | 1540     | aromatics with 3-5 rings, amorphous carbon structures                                                                                       |
| $V_L$     | 1465     | methylene or methyl, semicircle breathing of aromatic rings, amorphous carbon structures                                                    |
| $V_R$     | 1380     | methyl group, semicircle breathing of aromatic rings, amorphous carbon structures                                                           |
| $D$       | 1300     | D band on highly ordered carbonaceous materials, C-C between aromatic rings and aromatics with no less than six rings                       |
| $S_L$     | 1230     | aryl-alkyl ether, para-aromatics                                                                                                            |
| $S$       | 1185     | $C_{aromatic}-C_{alkyl}$ , aromatic (aliphatic) ethers, C-C on hydroaromatic rings, hexagonal diamond carbon $sp^3$ , C-H on aromatic rings |
| $S_R$     | 1080     | C-H on aromatic rings, benzene (ortho-disubstituted) ring                                                                                   |

**Table S3** The elemental composition of samples based on XPS spectroscopy fitting.

| Sample | C 1s (at.%) |         |                   | O 1s (at.%) |      |          |
|--------|-------------|---------|-------------------|-------------|------|----------|
|        | $sp^2C$     | $sp^3C$ | $Asp^2C/A\ sp^3C$ | Carbonyl    | C-O  | Carboxyl |
| NGC    | 55.3        | 22.5    | 0.41              | 31.8        | 41.1 | 27.1     |
| SGC    | 63.8        | 23.3    | 0.37              | 40.1        | 38.7 | 21.2     |
| LGC    | 64.1        | 19      | 0.30              | 41.6        | 34.8 | 23.6     |

**Table S4** The structure attribution of chemical shifts based on  $^{13}\text{C}$  NMR spectra.

| Chemical Shift | Carbon type                      | Sign                                                |  |                                                                      |  |
|----------------|----------------------------------|-----------------------------------------------------|--|----------------------------------------------------------------------|--|
| 0-16           | R-CH <sub>3</sub>                | $f_{al}^*$ : -CH <sub>3</sub>                       |  |                                                                      |  |
| 16-20          | Ar-CH <sub>3</sub>               |                                                     |  |                                                                      |  |
| 20-23          | CH <sub>2</sub> -CH <sub>3</sub> |                                                     |  |                                                                      |  |
| 23-35          | CH <sub>2</sub>                  | $f_{al}^H$ : -CH or -CH <sub>2</sub>                |  | $f_{al}$ : total aliphatic carbon                                    |  |
| 35-50          | C, CH                            |                                                     |  |                                                                      |  |
| 50-60          | O-CH <sub>3</sub> , O-CH         | $f_{al}^O$ : bonded to oxygen                       |  |                                                                      |  |
| 60-75          | O-CH                             |                                                     |  |                                                                      |  |
| 75-90          | R-O-R                            |                                                     |  |                                                                      |  |
| 90-129         | Ar-H                             | $f_a^H$ : protonated aromatic                       |  |                                                                      |  |
| 129-137        | Bridgehead (C-C)                 | $f_a^B$ : aromatic bridgehead carbon                |  | $f_a'$ : aromatic carbon<br><br>$f_a$ : total sp <sup>2</sup> carbon |  |
| 137-150        | Ar-C                             | $f_a^S$ : alkylated aromatic carbon                 |  |                                                                      |  |
| 150-170        | Ar-O                             | $f_a^P$ : aromatic ether or phenolic hydroxylcarbon |  |                                                                      |  |
| 170-190        | COOH                             | $f_a^C$ : carbonyl or carboxyl carbon               |  |                                                                      |  |
| 190-220        | C=O                              |                                                     |  |                                                                      |  |

Aliphatic carbons ( $f_{al}$ ) are present on the side chains of aromatic hydrocarbon structural units, including methyl groups ( $f_{al}^*$ ), quaternary and methylene groups ( $f_{al}^H$ ), and oxygen-linked aliphatic carbons ( $f_{al}^O$ ). sp<sup>2</sup> C is mainly composed of carbonyl carbon ( $f_a^C$ ) and aromatic carbon ( $f_a'$ ), while  $f_a'$  is composed of protonated aromatic ( $f_a^H$ ) and nonprotonated aromatic carbon ( $f_a^N$ ), among which  $f_a^N$  includes aromatic bridgehead carbon ( $f_a^B$ ), alkylated aromatic carbon ( $f_a^S$ ), and aromatic ether or phenolic hydroxylcarbon ( $f_a^P$ ).

**Table S5** The structure parameters of samples based on  $^{13}\text{C}$  NMR spectroscopy fitting.

| Sample | $f_a$ | $f_a^C$ | $f_a'$ | $f_a^H$ | $f_a^N$ | $f_a^B$ | $f_a^S$ | $f_a^P$ | $f_{al}$ | $f_{al}^*$ | $f_{al}^H$ | $f_{al}^O$ |
|--------|-------|---------|--------|---------|---------|---------|---------|---------|----------|------------|------------|------------|
| NGC    | 75.7  | 19.7    | 56.0   | 10.4    | 45.6    | 35.5    | 8.9     | 1.2     | 24.3     | 4.1        | 3.2        | 17.1       |
| SGC    | 82.7  | 16.3    | 66.4   | 21.5    | 44.9    | 31.7    | 12.6    | 0.7     | 17.3     | 3.2        | 2.8        | 11.4       |
| LGC    | 85.1  | 17.1    | 68.0   | 21.6    | 46.4    | 34.0    | 12.2    | 0.2     | 14.9     | 2.8        | 1.6        | 10.5       |

$f_a$ : total sp<sup>2</sup> carbon;  $f_a^C$ : carbonyl or carboxyl carbon;  $f_a'$ : aromatic carbon;  $f_a^H$ : protonated aromatic carbon;  $f_a^N$ : nonprotonated aromatic carbon;  $f_a^B$ : aromatic bridgehead carbon;  $f_a^S$ : alkylated aromatic carbon;  $f_a^P$ : aromatic ether or phenolic hydroxylcarbon;  $f_{al}$ : total aliphatic carbon;  $f_{al}^*$ : -CH<sub>3</sub>;  $f_{al}^H$ : -CH or -CH<sub>2</sub>;  $f_{al}^O$ : bonded to oxygen.

**Table S6** The structure parameters of samples based on XRD and Raman.

| Sample | $d_{002}$<br>Å | $L_c$<br>nm | $L_a$<br>nm | $R$  | $A_D/A_G$ |
|--------|----------------|-------------|-------------|------|-----------|
| NGC-HC | 3.85           | 1.28        | 6.19        | 1.87 | 1.32      |
| SGC-HC | 3.80           | 1.51        | 6.56        | 2.53 | 1.22      |
| LGC-HC | 3.74           | 1.60        | 7.58        | 2.82 | 1.11      |

The carbon layer distance ( $d_{002}$ ) was calculated based on Bragg's equation ( $d = \lambda / 2 \sin \theta$ ). The thickness ( $L_c$ ) and average width ( $L_a$ ) of graphite crystallites were calculated by Scherrer formula ( $L = K\lambda / (\beta \cos \theta)$ ). The parameter ( $R$ ), a representative measure calculated from the intensity of the (002) peak, which represents the ratio of the peak height to the background, has been used to quantify the degree of carbon disorder.

**Table S7** The specific surface area, pore volume, and most probable apertures of samples based on N<sub>2</sub> adsorption-desorption test.

| Samples | Surface Area<br>(m <sup>2</sup> g <sup>-1</sup> ) |             | Pore volume<br>(cm <sup>3</sup> g <sup>-1</sup> ) |             | Most probable<br>apertures (nm) |
|---------|---------------------------------------------------|-------------|---------------------------------------------------|-------------|---------------------------------|
|         | $S_{BET}$                                         | $S_{micro}$ | $V_{total}$                                       | $V_{micro}$ |                                 |
| NGC-HC  | 17.7                                              | 10.2        | 0.02                                              | 0.005       | 2.0                             |
| SGC-HC  | 11.5                                              | 0           | 0.025                                             | 0           | 2.1                             |
| LGC-HC  | 13.3                                              | 0           | 0.024                                             | 0           | 1.9                             |

**Table S8** The pre-oxidation strategy for modifying pitch and the performance of SIBs

| Samples     | Modification Strategy                                                                          | Gas/Liquid<br>products                                            | Oxygen<br>Content<br>(wt%) | Capacity<br>(mA h g <sup>-1</sup> ;<br>mA g <sup>-1</sup> ) | ICE<br>(%) | Ref.         |
|-------------|------------------------------------------------------------------------------------------------|-------------------------------------------------------------------|----------------------------|-------------------------------------------------------------|------------|--------------|
| HPPC        | HNO <sub>3</sub> oxidation;<br>carbonized at 1300 °C                                           | NO <sub>3</sub> <sup>-</sup>                                      | -                          | 317;30                                                      | 88         | 1            |
| CPOP        | Air pre-oxidation at 300 °C;<br>carbonized at 1400 °C                                          | NO <sub>x</sub> , SO <sub>x</sub> , CO <sub>2</sub> ,<br>Volatile | 22                         | 300; 30                                                     | 88         | 2            |
| HC-325-12   | Air pre-oxidation at 325 °C;<br>carbonized at 1100 °C                                          | Organic<br>Compounds                                              | 28                         | 300; 20                                                     | 82         | 3            |
| PAOC-300-10 | Air pre-oxidation at 300 °C;<br>carbonized at 1200 °C                                          | (VOC)                                                             | 14                         | 275;30                                                      | 68         | 4            |
| PHC-1300    | HPO <sub>4</sub> modified at 360 °C-<br>Air pre-oxidized at 320 °C;<br>carbonized at 1400 °C   | PO <sub>4</sub> <sup>-</sup>                                      | -                          | 284; 30                                                     | 72         | 5            |
| ACM-1400    | HNO <sub>3</sub> /H <sub>2</sub> SO <sub>4</sub> -oxidation at 80 °C;<br>carbonized at 1400 °C | SO <sub>4</sub> <sup>2-</sup> , NO <sub>3</sub> <sup>-</sup>      | -                          | 292; 25                                                     | 75         | 6            |
| NGC-HC      | H <sub>2</sub> O <sub>2</sub> /HCOOH-oxidation at 25 °C;<br>carbonized at 1300 °C              | H <sub>2</sub> O                                                  | 28                         | 299; 30                                                     | 73         | work         |
| SGC-HC      | Oxidation-hydrothermal cascade<br>strategy -                                                   | H <sub>2</sub> O                                                  | 18                         | 318;30                                                      | 76         | This<br>work |

**Table S9** The EIS fitting results for the samples by the equivalent circuit model.

| Samples   | $R_e$ (Ω) | $R_{SEI}$ (Ω) | $R_{ct}$ (Ω) |
|-----------|-----------|---------------|--------------|
| NGC-HC    | 3.3       | 0.32          | 28.4         |
| SGC-HC    | 3.4       | 0.22          | 18.3         |
| LGC-HC    | 2.6       | 0.62          | 11.4         |
| CTP-SC    | 2.9       | 0.90          | 4.3          |
| S-OCTP-HC | 2.9       | 0.80          | 13.2         |

1. Z. Xiong, L. Yue, Y. Zhang, H. Ding, L. Bai, Q. Zhao, T. Mei, J. Cao, Y. Qi and M. Xu, *Journal of Colloid and Interface Science*, 2024, **658**, 610-616.
2. Y. Lu, C. Zhao, X. Qi, Y. Qi, H. Li, X. Huang, L. Chen and Y.-S. Hu, *Advanced Energy Materials*, 2018, **8**, 1800108.
3. R. Xu, Z. Yi, M. Song, J. Chen, X. Wei, F. Su, L. Dai, G. Sun, F. Yang, L. Xie and C.-M. Chen, *Carbon*, 2023, **206**, 94-104.
4. B. Wang, Y. Yao, W. Wang, Y. Xu, Y. Wan, Y. Sun, Q. Li, H. Hu and M. Wu, *Journal of Colloid and Interface Science*, 2024, **664**, 681-690.
5. H. Wang, S. Liu, C. Lei, H. Qiu, W. Jiang, X. Sun, Y. Zhang and W. He, *Electrochimica Acta*, 2024, **477**, 143812.
6. Q. Li, Y. Zhu, P. Zhao, C. Yuan, M. Chen and C. Wang, *Carbon*, 2018, **129**, 85-94.
